# Supplementary material for: A P-doped PtTe mesoporous nanotube electrocatalyst
Source: Royal Society of Chemistry journal article supplement (doi:10.1039/d0se00326c), 2020-01-01
Supplement: d0se00326c1.pdf [file d0se00326c1.pdf]

Electronic Supplementary Information for

**P-doped PtTe mesoporous nanotube electrocatalyst**

Ziqiang Wang, Hugang Zhang, Shuli Yin, Songliang Liu, Zechuan Dai, You Xu, Xiaonian Li,

Liang Wang\* and Hongjing Wang\*

State Key Laboratory Breeding Base of Green-Chemical Synthesis Technology, College of  
Chemical Engineering, Zhejiang University of Technology, Hangzhou 310014, P. R. China

Corresponding authors' E-mails: wangliang@zjut.edu.cn; hjw@zjut.edu.cn

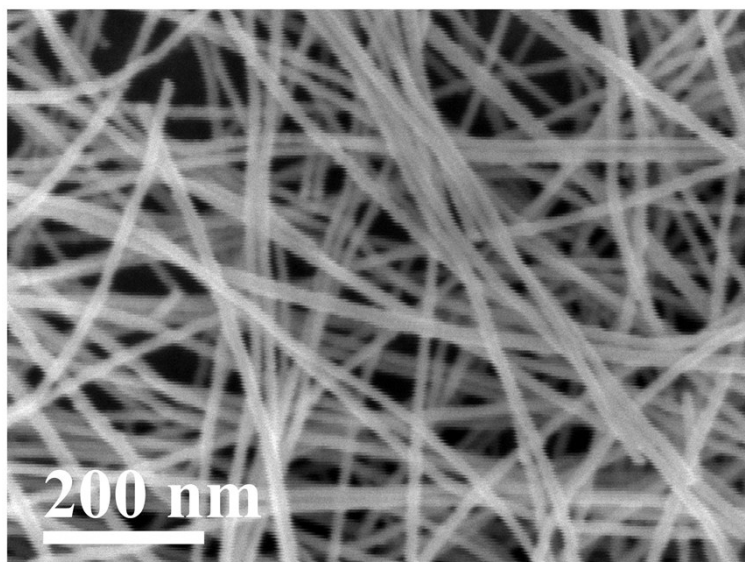

**Fig. S1** SEM image of the Te NWs.

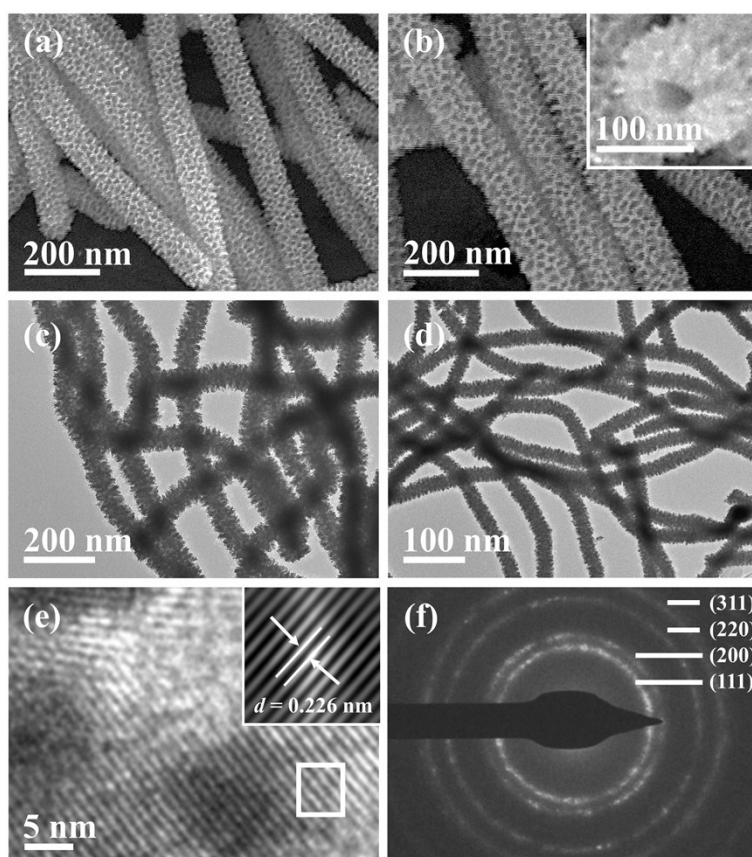

**Fig. S2** (a, b) SEM, (c, d) TEM and (e) HRTEM images of the PtTe MNTs and (f) SAED pattern of the PtTe MNTs. The inset in (e) shows the Fourier filtered lattice image of the square area in (e).

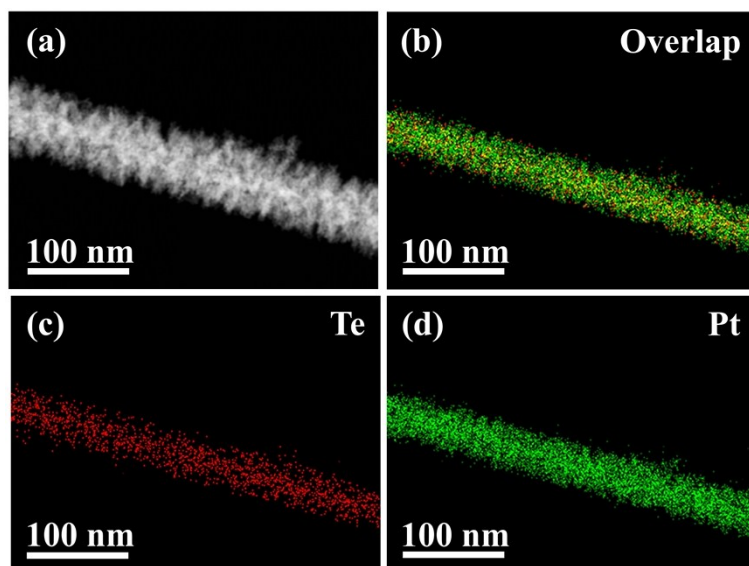

**Fig. S3** (a) HAADF-STEM image and (b-d) elemental mapping images of the PtTe MNTs.

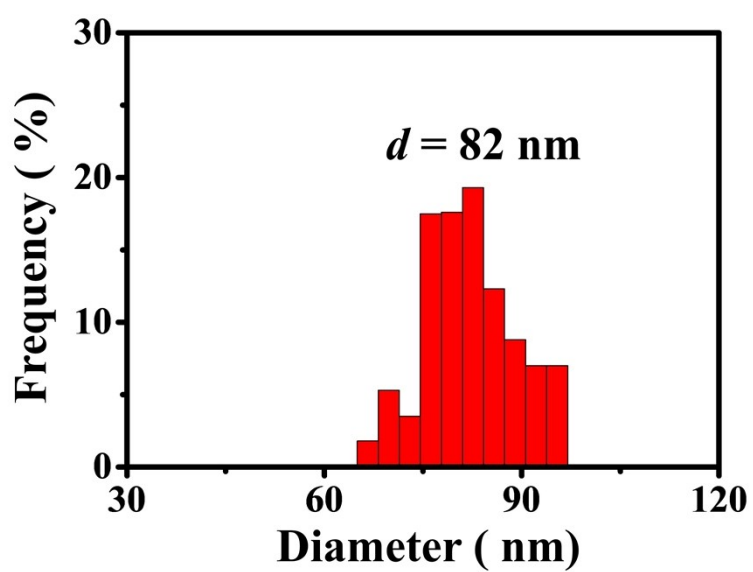

**Fig. S4** Histogram of the diameter distribution for P-PtTe MNTs.

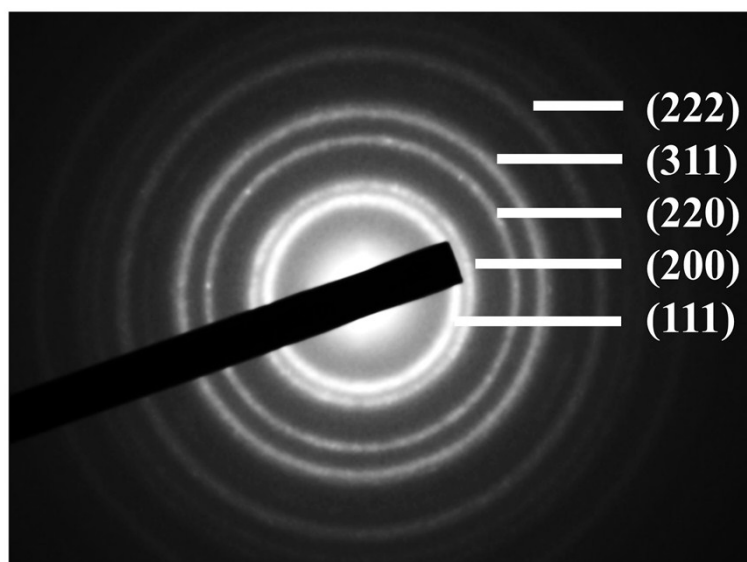

**Fig. S5** The SAED pattern of the P-PtTe MNTs.

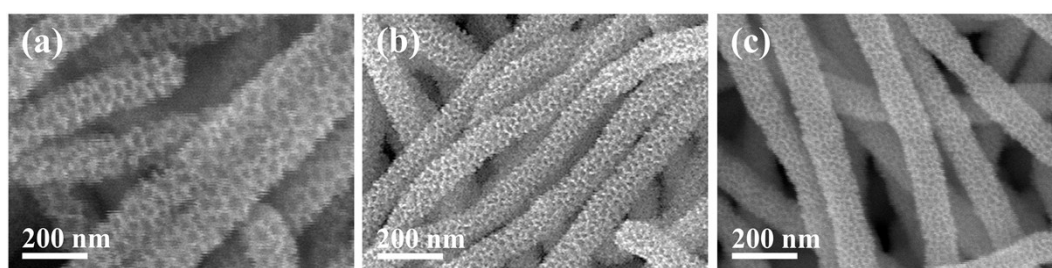

**Fig. S6** SEM images of the samples prepared with different amounts of TOP under the typical synthesis: (a) 0.5 mL, (b) 1.0 mL and (c) 2.0 mL.

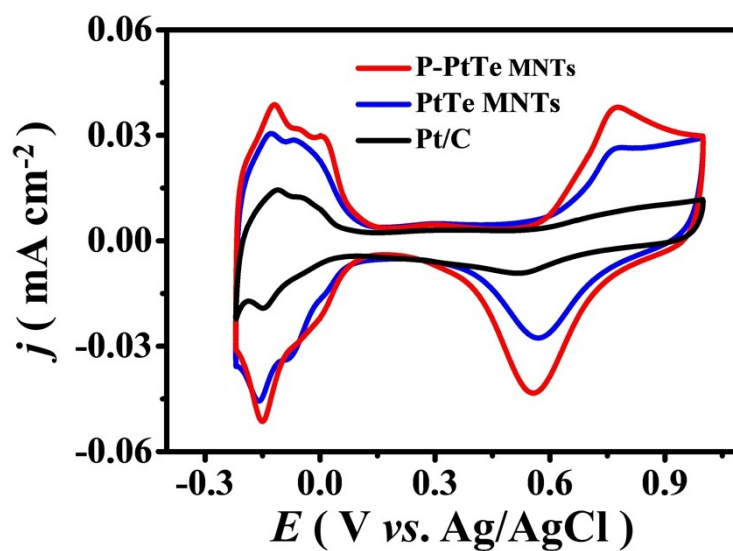

**Fig. S7** CVs of the catalysts recorded in a  $N_2$ -saturated 0.5 M  $H_2SO_4$  solution with a scan rate of 50  $mV s^{-1}$ .

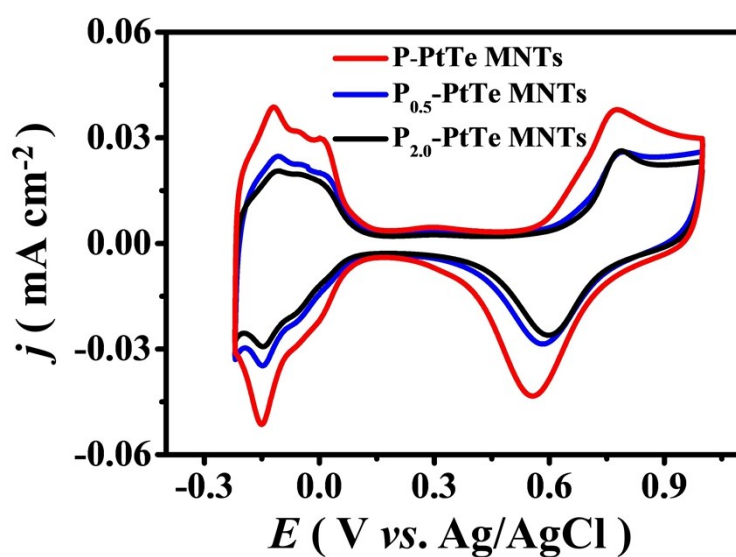

**Fig. S8** CVs of the catalysts recorded in a  $N_2$ -saturated 0.5 M  $H_2SO_4$  solution at a scan rate of 50  $mV s^{-1}$ .

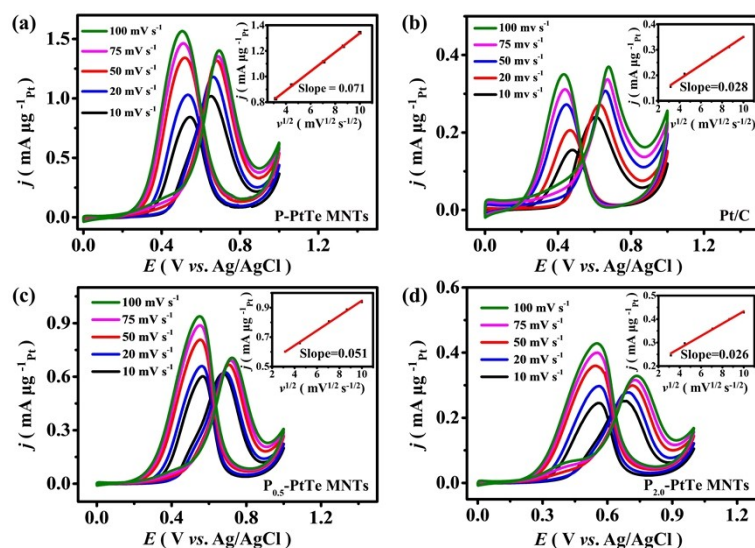

**Fig. S9** (a) CVs of MOR for samples at different scan rates. (b) The corresponding plots of forward peak currents ( $j_m$ ) versus the square root of the scan rates ( $\nu^{1/2}$ ).

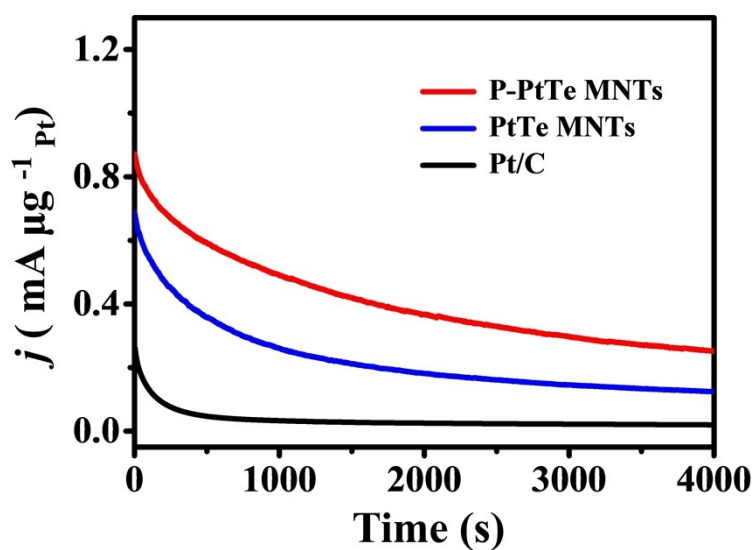

**Fig. S10** Chronoamperometric curves of samples recorded at 0.6 V in a 0.5 M  $\text{H}_2\text{SO}_4$  solution containing 1.0 M  $\text{CH}_3\text{OH}$ .

**Table S1** The mass activity comparison of MOR on various Pt-based electrocatalysts.

| Catalysts                                               | Condition                                                                      | Scan rate<br>(mV s <sup>-1</sup> ) | Mass activity<br>(A mg <sup>-1</sup> Pt) | Ref.                 |
|---------------------------------------------------------|--------------------------------------------------------------------------------|------------------------------------|------------------------------------------|----------------------|
| <b>P-PtTe MNTS</b>                                      | <b>0.5 M H<sub>2</sub>SO<sub>4</sub> containing<br/>1.0 M CH<sub>3</sub>OH</b> | <b>50</b>                          | <b>0.872</b>                             | <b>This<br/>work</b> |
| PtRh Nanosponges                                        | 0.5 M H <sub>2</sub> SO <sub>4</sub> containing<br>1.0 M CH <sub>3</sub> OH    | 50                                 | 0.4049                                   | 1                    |
| PtRu/rGO-2                                              | 0.5 M H <sub>2</sub> SO <sub>4</sub> containing<br>1.0 M CH <sub>3</sub> OH    | 50                                 | 0.739                                    | 2                    |
| PtPdTe Nanowire                                         | 0.5 M H <sub>2</sub> SO <sub>4</sub> containing<br>1.0 M CH <sub>3</sub> OH    | 50                                 | 0.595                                    | 3                    |
| Pt-CoO <sub>x</sub> /MWCNTs                             | 0.5 M H <sub>2</sub> SO <sub>4</sub> containing<br>1.0 M CH <sub>3</sub> OH    | 50                                 | 0.7797                                   | 4                    |
| TePbPt Alloy<br>Nanotube                                | 0.5 M H <sub>2</sub> SO <sub>4</sub> containing<br>1.0 M CH <sub>3</sub> OH    | 50                                 | 0.532                                    | 5                    |
| Hollow Pt-on-Pd<br>Nanodendrites                        | 0.5 M H <sub>2</sub> SO <sub>4</sub> containing<br>1.0 M CH <sub>3</sub> OH    | 50                                 | 0.58                                     | 6                    |
| Aligned Nanoporous<br>Pt <sub>60</sub> Cu <sub>40</sub> | 0.5 M H <sub>2</sub> SO <sub>4</sub> containing<br>1.0 M CH <sub>3</sub> OH    | 50                                 | ~0.75                                    | 7                    |
| Pt-WO <sub>2</sub> /WO <sub>3</sub>                     | 0.5 M H <sub>2</sub> SO <sub>4</sub> containing<br>1.0 M CH <sub>3</sub> OH    | 50                                 | 0.694                                    | 8                    |
| PtCu/3D N-G                                             | 0.5 M H <sub>2</sub> SO <sub>4</sub> containing<br>1.0 M CH <sub>3</sub> OH    | 50                                 | 0.7412                                   | 9                    |
| Pt/e-RGO-SWCNT                                          | 0.5 M H <sub>2</sub> SO <sub>4</sub> containing<br>1.0 M CH <sub>3</sub> OH    | 50                                 | 0.1917                                   | 10                   |
| Platinum Nanosheets                                     | 0.5 M H <sub>2</sub> SO <sub>4</sub> containing<br>1.0 M CH <sub>3</sub> OH    | 50                                 | 0.2696                                   | 11                   |
| PtPdCu<br>Nanodendrites                                 | 0.5 M H <sub>2</sub> SO <sub>4</sub> containing<br>1.0 M CH <sub>3</sub> OH    | 50                                 | 0.688                                    | 12                   |
| Atomic-Layer<br>Pt/Pt <sub>3</sub> Ga                   | 0.5 M H <sub>2</sub> SO <sub>4</sub> containing<br>1.0 M CH <sub>3</sub> OH    | 50                                 | 1.094                                    | 13                   |
| Pt/CeO <sub>2</sub> -P                                  | 0.5 M H <sub>2</sub> SO <sub>4</sub> containing<br>1.0 M CH <sub>3</sub> OH    | 50                                 | 0.714                                    | 14                   |
| Pt <sub>3</sub> Sn-SnO <sub>2</sub> /NG<br>Catalyst     | 0.5 M H <sub>2</sub> SO <sub>4</sub> containing<br>1.0 M CH <sub>3</sub> OH    | 50                                 | 0.469                                    | 15                   |

## References

- 1 Q. Lu, J. Huang, C. Han, L. Sun and X. Yang, *Electrochim. Acta*, 2018, **266**, 305-311.
- 2 Y. Shi, W. Zhu, H. Shi, F. Liao, Z. Fan and M. Shao, *J. Colloid Interface Sci.*, 2019, **557**, 729-736.
- 3 H. Li, S. Zhao, M. Gong, H. Cui, D. He, H. Liang, L. Wu and S. Yu, *Angew. Chem., Int. Ed.*, 2013, **52**, 7472-7476.
- 4 A. Nouralishahi, A. Rashidi, Y. Mortazavi, A. Khodadadi and M. Choolaei, *Appl. Surf. Sci.*, 2015, **335**, 55-64.
- 5 L. Yang, G. Li, J. Ge, C. Liu, Z. Jin, G. Wang and W. Xing, *J. Mater. Chem. A*, 2018, **6**, 16792-16803.
- 6 L. Wang and Y. Yamauchi, *J. Am. Chem. Soc.*, 2013, **135**, 16762-16765.
- 7 H. Qiu, X. Shen, J. Wang, A. Hirata, T. Fujita, Y. Wang and M. Chen, *ACS Catal.*, 2015, **5**, 3779-3785.
- 8 Y. Zhou, X. Hu, X. Liu and H. Wen, *Chem. Commun.*, 2015, **51**, 15297-15299.
- 9 X. Peng, D. Chen, X. Yang, D. Wang, M. Li, C. Tseng, R. Panneerselvam, X. Wang, W. Hu, J. Tian and Y. Zhao, *ACS Appl. Mater. Interfaces*, 2016, **8**, 33673-33680.
- 10 Q. Zhang, F. Yue, L. Xu, C. Yao, R. Priestley and S. Hou, *Appl. Catal., B*, 2019, **257**, 117886.
- 11 M. Chhetri, M. Rana, B. Loukya, P. Patil, R. Datta and U. K. Gautam, *Adv. Mater.*, 2015, **27**, 4430-4437.
- 12 R. Chang, L. Zheng, C. Wang, D. Yang, G. Zhang, Sh. Sun, *Appl. Catal., B*, 2017, **211**, 205-211.
- 13 Q. Feng, S. Zhao, D. He, S. Tian, L. Gu, X. Wen, C. Chen, Q. Peng, D. Wang and Y. Li, *J. Am. Chem. Soc.*, 2018, **140**, 2773-2776.
- 14 L. Tao, Y. Shi, Y.-C. Huang, R. Chen, Y. Zhang, J. Huo, Y. Zou, G. Yu, J. Luo, C.-L. Dong, S. Wang, *Nano Energy*, 2018, **53**, 604-612.
- 15 L. Wang, W. Wu, Z. Lei, T. Zeng, Y. Tan, N. Cheng and X. Sun, *J. Mater. Chem. A*, 2020, **8**,



592-598.
